# Supplementary material for: Virtual Assistance in Any Context
Source: Springer Nature journal article supplement (doi:10.1007/s12599-020-00644-1), 2020-04-06
Supplement: 12599_2020_644_MOESM1_ESM.pdf [file 12599_2020_644_MOESM1_ESM.pdf]

# **Virtual Assistance in any Context – A Taxonomy of Design Elements for Domain-Specific Chatbots**

**Antje Janssen, Jens Passlick, Davinia Rodriguez Cardona, Michael H. Breitner**

Business & Information Systems Engineering (2020)

**Appendix (available online via <http://link.springer.com>)**

# Appendix

| Perspectives                      | Iteration 1                        | Iteration 2                       | Iteration 3                           | Iteration 4                      | Iteration 5                                | Iteration 6                                     |
|-----------------------------------|------------------------------------|-----------------------------------|---------------------------------------|----------------------------------|--------------------------------------------|-------------------------------------------------|
| Approach                          | Conceptual-to-empirical            | Empirical-to-conceptual           | Empirical-to-conceptual               | Empirical-to-conceptual          | Empirical-to-conceptual                    | Evaluation                                      |
| <b>Intelligence</b>               | Degree of Intelligence             |                                   |                                       |                                  |                                            |                                                 |
|                                   | Intelligence framework             | Intelligence framework            | Intelligence framework                | Intelligence framework           | Intelligence framework                     | D <sub>1</sub> Intelligence framework           |
|                                   | Type of AIS                        |                                   |                                       |                                  |                                            |                                                 |
|                                   | Type of expert systems             |                                   |                                       |                                  |                                            |                                                 |
|                                   | Intelligence                       | Intelligence                      |                                       |                                  |                                            | D <sub>1</sub> Socio-emotional behavior         |
|                                   | Sentiment detection                | Sentiment detection               | Sentiment detection                   |                                  |                                            | D <sub>2</sub> Service integration              |
|                                   | Emotional quotient                 |                                   |                                       | Service provider integration     | Service provider integration               | D <sub>3</sub> Personality processing           |
|                                   | Personality processing             | Personality processing            | Personality processing                | Personality processing           | Personality processing                     | D <sub>2</sub> Intelligence quotient            |
|                                   | Platform integration               | Platform integration              |                                       |                                  |                                            |                                                 |
|                                   | Intelligence quotient              | Intelligence quotient             | Intelligence quotient                 | Intelligence quotient            | Intelligence quotient                      |                                                 |
| Manager type                      |                                    |                                   |                                       |                                  |                                            |                                                 |
| <b>Interaction</b>                | Communication mode                 | Communication mode                | Communication mode                    | Communication mode               | Communication mode                         |                                                 |
|                                   | Interaction type                   |                                   |                                       |                                  |                                            |                                                 |
|                                   | Multimodality                      | M multimodality                   | Multimodality                         | M multimodality                  | Multimodality                              | D <sub>4</sub> Multimodality                    |
|                                   | Number of humans                   | Number of humans                  | Number of participants                | Number of participants           | Number of participants                     | D <sub>10</sub> Number of participants          |
|                                   | Locus of control                   | Locus of control                  | System architecture - user experience | User assistance design           | User assistance design                     | D <sub>6</sub> User assistance design           |
|                                   | Socio-emotional behavior           | Socio-emotional behavior          | Socio-emotional behavior              | Socio-emotional behavior         | Socio-emotional behavior                   | D <sub>11</sub> Additional human support        |
|                                   | Additional human support           | Additional human support          | Additional human support              | Additional human support         | Additional human support                   |                                                 |
|                                   | Memory                             |                                   |                                       |                                  |                                            |                                                 |
|                                   | CA presentation                    | CA presentation                   | CA presentation                       | Interface personalization        | Interface personalization                  | D <sub>9</sub> Interface personalization        |
|                                   | User interface                     | User interface                    | User interface                        | Front-end user interface channel | Front-end user interface channel           | D <sub>7</sub> Front-end user interface channel |
| Interaction classification        | Interaction classification         | Interaction classification        | Interaction classification            | Interaction classification       | D <sub>8</sub> Interaction classification  |                                                 |
| Response content type             |                                    |                                   |                                       |                                  |                                            |                                                 |
| <b>Context</b>                    | Duration of relation               | Duration of relation              | Duration of relation                  | Relationship duration            | Relationship duration                      | D <sub>14</sub> Relation duration               |
|                                   | Role of conversational agent       | Role of conversational agent      | Role of conversational agent          | Chatbot role                     | Chatbot role                               | D <sub>13</sub> Chatbot role                    |
|                                   | Knowledge base                     | Knowledge base                    | Knowledge base                        | Knowledge base                   | Knowledge base                             |                                                 |
|                                   | Context aware assistant            |                                   |                                       |                                  |                                            |                                                 |
|                                   | Application domains                | Application domains               | Application domains                   | Application domains              | Application domain                         | D <sub>10</sub> Application domain              |
|                                   | Context                            | Context                           | Context                               | Context                          | Context                                    |                                                 |
|                                   | Collaboration goal                 | Collaboration goal                | Collaboration goal                    | Collaboration goal               | Collaboration goal                         | D <sub>16</sub> Collaboration goal              |
|                                   | Sequentiality of process structure |                                   |                                       |                                  |                                            |                                                 |
|                                   | Language                           |                                   |                                       |                                  |                                            |                                                 |
|                                   | Number of conversational agents    |                                   |                                       |                                  |                                            |                                                 |
| Motivation for chatbot use        | Motivation for chatbot use         | Motivation for chatbot use        | Motivation for chatbot use            | Motivation for chatbot use       | D <sub>17</sub> Motivation for chatbot use |                                                 |
| Networking technology             |                                    |                                   |                                       |                                  |                                            |                                                 |
| Technology                        |                                    |                                   |                                       |                                  |                                            |                                                 |
| Type of conversational interfaces | Type of conversational interfaces  | Type of conversational interfaces |                                       |                                  |                                            |                                                 |
| <b>Sum</b>                        | <b>36</b>                          | <b>23</b>                         | <b>21</b>                             | <b>20</b>                        | <b>19</b>                                  | <b>17</b>                                       |

Fig. A.1 Dimensions development for the chatbot taxonomy

**Table A.1** Taxonomy dimensions from literature review in Iteration 1

| Dimension                              | Armento et al. (2006) | Bitner et al. (2019) | Brandtzaeg & Følstad (2017) | Chen et al. (2017) | Den Boer (2017) | Di Prospero et al. (2017) | Diederich et al. (2019) | Edwards et al. (1988) | Ehrenbrink et al. (2016) | Følstad et al. (2018) | Gnewuch et al. (2017) | Knote et al. (2018) | Knote et al. (2019) | Maedche et al. (2016) | McTear (2016) | Mittal et al. (2016) | Montenegro et al. (2019) | Ochs et al. (2017) | Pfeuffer et al. (2019) | Sarikaya (2017) | Schuetzler et al. (2019) | Shum et al. (2018) | Sreedevi et al. (2017) | Strohmann et al. (2019) | Thorne (2017) | Wei et al. (2018) | Yalçın et al. (2019) | Zumstein & Hundertmark (2017) |  |   |
|----------------------------------------|-----------------------|----------------------|-----------------------------|--------------------|-----------------|---------------------------|-------------------------|-----------------------|--------------------------|-----------------------|-----------------------|---------------------|---------------------|-----------------------|---------------|----------------------|--------------------------|--------------------|------------------------|-----------------|--------------------------|--------------------|------------------------|-------------------------|---------------|-------------------|----------------------|-------------------------------|--|---|
| Application domains                    |                       |                      |                             |                    |                 |                           |                         |                       |                          |                       |                       |                     |                     |                       |               |                      |                          |                    |                        |                 |                          |                    |                        |                         |               |                   |                      |                               |  |   |
| CA presentation                        |                       | •                    |                             |                    |                 |                           |                         |                       |                          |                       |                       |                     | •                   |                       |               |                      |                          |                    | •                      |                 |                          | •                  |                        |                         |               |                   |                      |                               |  | • |
| Collaboration goal                     |                       | •                    |                             |                    |                 |                           |                         |                       |                          |                       |                       |                     |                     |                       |               |                      |                          |                    |                        |                 |                          |                    |                        |                         |               |                   |                      |                               |  |   |
| Communication mode                     |                       | •                    |                             |                    |                 | •                         | •                       |                       |                          |                       | •                     |                     | •                   |                       | •             |                      | •                        |                    |                        | •               |                          |                    |                        |                         |               |                   |                      |                               |  |   |
| Context                                |                       |                      |                             |                    |                 |                           | •                       |                       |                          |                       | •                     |                     |                     |                       |               |                      |                          |                    |                        |                 |                          |                    |                        |                         |               |                   |                      |                               |  |   |
| Context aware assistant                | •                     |                      |                             |                    |                 |                           |                         |                       |                          |                       |                       |                     |                     | •                     |               |                      |                          |                    |                        |                 |                          |                    |                        |                         | •             |                   |                      |                               |  |   |
| Degree of intelligence                 |                       |                      |                             |                    |                 |                           |                         | •                     |                          |                       |                       |                     |                     | •                     |               |                      |                          |                    |                        |                 |                          |                    |                        |                         |               |                   |                      |                               |  |   |
| Dialog manager type                    |                       |                      |                             |                    |                 |                           |                         |                       |                          |                       |                       |                     |                     |                       |               |                      |                          |                    |                        |                 |                          |                    |                        |                         |               |                   | •                    |                               |  |   |
| Duration of relation                   |                       |                      | •                           |                    |                 |                           |                         |                       |                          | •                     |                       |                     |                     |                       |               |                      |                          |                    |                        |                 |                          |                    |                        |                         |               |                   |                      | •                             |  |   |
| Emotional quotient                     |                       |                      |                             |                    |                 |                           |                         |                       |                          |                       |                       |                     |                     |                       |               |                      |                          |                    |                        |                 |                          |                    |                        |                         |               |                   | •                    |                               |  |   |
| Intelligence framework                 |                       |                      |                             |                    |                 |                           | •                       |                       |                          |                       |                       | •                   |                     |                       |               |                      |                          |                    |                        |                 |                          |                    |                        | •                       |               |                   | •                    |                               |  |   |
| Intelligence quotient                  |                       |                      |                             |                    |                 |                           |                         |                       |                          |                       |                       |                     |                     |                       |               |                      |                          |                    |                        |                 |                          |                    |                        |                         |               |                   | •                    |                               |  |   |
| Interaction classification             |                       |                      |                             |                    | •               |                           |                         |                       |                          |                       |                       |                     | •                   |                       |               |                      |                          |                    |                        |                 |                          |                    |                        |                         |               |                   |                      |                               |  |   |
| Interaction type                       |                       |                      |                             |                    |                 | •                         |                         |                       |                          |                       |                       |                     |                     |                       |               |                      |                          | •                  |                        |                 |                          |                    |                        |                         |               |                   |                      |                               |  |   |
| Knowledge base                         |                       |                      |                             |                    |                 |                           |                         |                       |                          |                       |                       |                     |                     |                       |               |                      |                          |                    |                        |                 |                          |                    |                        |                         |               |                   |                      |                               |  | • |
| Memory                                 |                       |                      |                             |                    |                 |                           |                         |                       |                          |                       |                       |                     |                     |                       |               |                      |                          |                    |                        |                 |                          |                    |                        |                         |               |                   | •                    |                               |  |   |
| Motivation for chatbot use             |                       | •                    |                             |                    |                 |                           |                         |                       |                          |                       |                       |                     |                     |                       |               |                      |                          |                    |                        |                 |                          |                    |                        |                         |               |                   |                      |                               |  |   |
| Multimodality                          |                       |                      |                             |                    |                 |                           |                         |                       |                          |                       | •                     |                     |                     |                       |               |                      |                          | •                  |                        |                 |                          |                    |                        |                         |               |                   |                      |                               |  |   |
| Number of participants                 |                       | •                    |                             |                    |                 |                           |                         |                       |                          |                       |                       |                     | •                   |                       |               | •                    |                          |                    |                        |                 |                          |                    |                        |                         |               |                   |                      |                               |  |   |
| Personality processing                 | •                     |                      |                             |                    |                 | •                         |                         |                       |                          |                       |                       |                     | •                   |                       |               |                      |                          |                    |                        |                 |                          |                    |                        |                         |               |                   |                      |                               |  |   |
| Platform integration                   |                       |                      |                             |                    |                 |                           | •                       |                       |                          |                       |                       |                     |                     |                       |               |                      |                          |                    |                        |                 |                          |                    |                        |                         |               |                   |                      |                               |  |   |
| Response content type                  |                       |                      |                             |                    | •               |                           |                         |                       |                          |                       |                       |                     |                     |                       |               |                      |                          |                    |                        |                 |                          |                    |                        |                         |               |                   |                      |                               |  |   |
| Role of conversational agent           |                       | •                    |                             |                    |                 |                           |                         |                       |                          |                       |                       |                     |                     |                       |               |                      |                          | •                  |                        |                 |                          |                    |                        |                         |               |                   |                      |                               |  |   |
| Sentiment detection                    |                       |                      |                             |                    |                 | •                         |                         | •                     |                          |                       |                       |                     |                     |                       |               |                      |                          |                    |                        | •               |                          |                    |                        |                         | •             |                   |                      |                               |  |   |
| Sequentiality of process structure     |                       | •                    |                             |                    |                 |                           |                         |                       |                          |                       |                       |                     |                     |                       |               |                      |                          |                    |                        |                 |                          |                    |                        |                         |               |                   |                      |                               |  |   |
| Socio-emotional behavior               | •                     |                      |                             |                    |                 |                           |                         |                       |                          |                       |                       |                     |                     |                       |               |                      |                          |                    | •                      |                 | •                        | •                  |                        |                         | •             |                   |                      | •                             |  |   |
| System architecture                    |                       |                      |                             |                    |                 |                           |                         |                       |                          | •                     |                       |                     |                     |                       |               |                      |                          |                    |                        | •               |                          |                    |                        |                         | •             |                   |                      |                               |  |   |
| Type of artificial intelligence system |                       |                      |                             |                    |                 |                           | •                       |                       |                          |                       |                       |                     |                     |                       |               |                      |                          |                    |                        |                 |                          |                    |                        | •                       |               |                   |                      |                               |  |   |
| Type of conversational interfaces      |                       |                      |                             |                    |                 |                           |                         |                       |                          |                       |                       |                     |                     | •                     |               |                      |                          |                    |                        |                 |                          |                    |                        |                         |               |                   |                      |                               |  |   |
| Type of expert systems                 |                       |                      |                             |                    |                 |                           |                         |                       |                          |                       |                       |                     |                     |                       |               |                      |                          |                    |                        |                 |                          |                    |                        | •                       |               |                   |                      |                               |  |   |
| User interface                         |                       |                      |                             |                    | •               |                           |                         |                       |                          |                       |                       |                     |                     |                       |               |                      |                          |                    |                        |                 |                          |                    |                        |                         |               |                   |                      |                               |  |   |

**Table A.2** Definitions and underlying conceptual bases of the taxonomy characteristics

| <i>Dimension <math>D_i</math> /Characteristics</i><br><i><math>C_{i,j}</math></i> | <i>Definition</i>                                                                                                                                                                                                                                                                                                                                                                                                                                                                                                                                                                                                                                                                                                                                                                                                                                                                                                    |
|-----------------------------------------------------------------------------------|----------------------------------------------------------------------------------------------------------------------------------------------------------------------------------------------------------------------------------------------------------------------------------------------------------------------------------------------------------------------------------------------------------------------------------------------------------------------------------------------------------------------------------------------------------------------------------------------------------------------------------------------------------------------------------------------------------------------------------------------------------------------------------------------------------------------------------------------------------------------------------------------------------------------|
| <b>D<sub>1</sub> Intelligence framework</b>                                       |                                                                                                                                                                                                                                                                                                                                                                                                                                                                                                                                                                                                                                                                                                                                                                                                                                                                                                                      |
| C <sub>1,1</sub> Rule-based system                                                | A simple reflex conversational agent (CA) whose capacity to process the user utterances is based on the application of “[...] a set of ‘if-then rules’ to determine suitable actions for the detected situation” (Knote et al. 2018 p. 1087). In a general sense, a CA with this underlying cognitive system design primarily detects the situation implied in the user utterance through a domain-specific keyword search, and subsequently, retrieves the most suitable predefined response or default actions from a knowledge base (Chen et al. 2017). Rule-based CA are recognizable by the fact that they react exclusively to defined input options from which the user can choose. These are either selection options that the user can click on or predefined answer options that the user types into the text field.                                                                                       |
| C <sub>1,2</sub> Utility-based system                                             | A CA whose capacity to process the input from the user is based on a retrieval-based response model that enables the CA to “[...] differentia[te] measures on how desirable a goal state is” (Knote et al. 2018 p. 1087), in proportion to the user preferences (utility function) defined through value constraints in the form of, e.g., "inform slots" or "ranking criteria". Characteristically, a CA with this underlying cognitive system design provides as output, utility-based suggestions (e.g. action or item recommendations) within the value constraints provided by the user (Chen et al. 2017; Zheng 2019). Utility-based CA are detected by the characteristic that they ask targeted questions, whose answers the chatbot uses to perform an action. For example, a chatbot in e-commerce asks the user for color and clothing preferences and then suggests a suitable garment.                  |
| C <sub>1,3</sub> Model-based system                                               | A CA whose capacity to process the input from the user is based on an internal model of environmental conditions that enables the CA to “[...] [explain] and [predict] ‘how the world works’”. Although this allows the agent for rudimentary self-reflection, [a model-based CA] chooses an action in the same way as a simple reflex agent.” (Knote et al. 2018 p. 1087)                                                                                                                                                                                                                                                                                                                                                                                                                                                                                                                                           |
| C <sub>1,4</sub> Goal-based system                                                | A CA whose capacity to process the user utterances is based on an end-to-end model that enables the CA to choose an action to achieve a specific goal state once that the goal-dependent parameters set by the user had been reached (Chen et al. 2017; Knote et al. 2018). A CA with this underlying cognitive system design can be based on memory networks or a neural architecture to allow the user to track the goal achievement by retrieving information about specific values related to the goal (Sukhbaatar et al. 2015; Li et al. 2016). Goal-based CA can be identified by the fact that they recognize from the textual input the users’ intention and help the user to perform a task within a delimited application area. For example, a goal-based airline chatbot recognizes within the dialogue whether the user, e.g., wants travel advice or to cancel a flight and helps to achieve this goal. |

| <i>Dimension <math>D_i</math> /Characteristics</i>        | <i>Definition</i>                                                                                                                                                                                                                                                                                                                                                                                                                                                                                                                                                                                                                                                                                                                                                        |
|-----------------------------------------------------------|--------------------------------------------------------------------------------------------------------------------------------------------------------------------------------------------------------------------------------------------------------------------------------------------------------------------------------------------------------------------------------------------------------------------------------------------------------------------------------------------------------------------------------------------------------------------------------------------------------------------------------------------------------------------------------------------------------------------------------------------------------------------------|
| <i><math>C_{i,j}</math></i>                               |                                                                                                                                                                                                                                                                                                                                                                                                                                                                                                                                                                                                                                                                                                                                                                          |
| C <sub>1,5</sub> Self-learning system                     | A CA whose capacity to process the input from the user improves through the incorporation of learning outcomes from previous interactions. Commonly, a CA shows signs of self-learning if it asks the user monitoring questions (e.g. yes-no questions) regarding the quality, correctness or usefulness of the provided response to optimize future responses (Chen et al. 2017). The cognitional design system of this type of CA integrates “a separate learning element which is responsible for behavior adaptation, while the performance element chooses which actions to take” (Knote et al. 2018 p. 1088). Self-learning chatbots can be recognized by the attribute that they continually improve by learning from the information gathered within a dialogue. |
| <b>D<sub>2</sub> Intelligence quotient</b>                |                                                                                                                                                                                                                                                                                                                                                                                                                                                                                                                                                                                                                                                                                                                                                                          |
| C <sub>2,1</sub> Only rule-based knowledge                | The chatbot has the capability to operate only on the basis of a set of ‘if-then rules’ (Knote et al. 2018 p. 1087). This is shown by the circumstance that rule-based chatbots only react to specific commands and provide a possible response spectrum. These predefined response options, e.g. "yes" or "no", are then either to be entered by the user or clicked on.                                                                                                                                                                                                                                                                                                                                                                                                |
| C <sub>2,2</sub> Text understanding                       | The chatbot has the capability to rationalize textual input using semantics natural language processing and has sufficient domain-specific linguistic knowledge to provide suitable responses (Nuruzzaman and Hussain 2018). This is shown by the possibility for the user to interact with the chatbot via a free text field without any specifications. Sentences can be formed by the user, from which the chatbot extracts the necessary information and processes it.                                                                                                                                                                                                                                                                                               |
| C <sub>2,3</sub> Text understanding and further abilities | The chatbot not only has the capability to understand textual input, but also incorporates additional abilities such as inference, math calculation, photo recognition and interpretation, etc. In this context, chatbots can, e.g., read, interpret and evaluate photos uploaded within the dialogue.                                                                                                                                                                                                                                                                                                                                                                                                                                                                   |
| <b>D<sub>3</sub> Personality processing</b>               |                                                                                                                                                                                                                                                                                                                                                                                                                                                                                                                                                                                                                                                                                                                                                                          |
| C <sub>3,1</sub> Principal self                           | The “response [of the chatbot] adheres to a set of standards based on the agent’s role and responsibilities” (Di Prospero et al. 2017 p. 77).                                                                                                                                                                                                                                                                                                                                                                                                                                                                                                                                                                                                                            |
| C <sub>3,2</sub> Adaptive self                            | The chatbot has the “capacity to recognize the personality of the end-users and adapting” (Di Prospero et al. 2017 p. 77) to the language, choice of words, mood and gender of the counterpart (Yalçın 2019). The real-time identification of personality traits (e.g. extroversion: extroverted or introverted and agreeableness: submissive or dominant) are identified by using interactive genetic algorithms and personality models, e.g., Big Five personality traits model or Myers-Briggs Type Indicator (Lee et al. 2012; Yorita et al. 2019).                                                                                                                                                                                                                  |
| <b>D<sub>4</sub> Social-emotional behavior</b>            |                                                                                                                                                                                                                                                                                                                                                                                                                                                                                                                                                                                                                                                                                                                                                                          |
| C <sub>4,1</sub> Not present                              | The chatbot does not possess the capacity to show affection or empathy towards the individual needs and immediate feedback of the user (Bittner et al. 2019).                                                                                                                                                                                                                                                                                                                                                                                                                                                                                                                                                                                                            |

| <i>Dimension D<sub>i</sub> /Characteristics</i> | <i>Definition</i>                                                                                                                                                                                                                                                                                                                                        |
|-------------------------------------------------|----------------------------------------------------------------------------------------------------------------------------------------------------------------------------------------------------------------------------------------------------------------------------------------------------------------------------------------------------------|
| <i>C<sub>i,j</sub></i>                          |                                                                                                                                                                                                                                                                                                                                                          |
| C <sub>4,2</sub> Present                        | The chatbot has the resonance capacity to show affection or empathy towards the individual needs and immediate feedback of the user (Bittner et al. 2019). The chatbot captures the feelings resonating in the dialogue and is emotionally transmitted from the user's point of view by reacting empathically to the specific feelings (Hu et al. 2018). |
| <b>D<sub>5</sub> Service integration</b>        |                                                                                                                                                                                                                                                                                                                                                          |
| C <sub>5,1</sub> None                           | The chatbot does not integrate further services. When interacting with the chatbot, no further functionality is provided except communication in defined structures.                                                                                                                                                                                     |
| C <sub>5,2</sub> Single integration             | The chatbot can integrate one service. A further function besides communication is offered. For example, information can be queried from a database or an image recognition can be performed.                                                                                                                                                            |
| C <sub>5,3</sub> Multiple integration           | The chatbot can integrate two or more services. The definition is similar to C <sub>5,2</sub> except that several services are offered in one chatbot.                                                                                                                                                                                                   |
| <b>D<sub>6</sub> Multimodality</b>              |                                                                                                                                                                                                                                                                                                                                                          |
| C <sub>6,1</sub> Unidirectional                 | The chatbot has the capacity to receive input through different communication channels (e.g. text and voice input) but it can only respond through one communication channel (e.g. only text or voice output) (Knote et al. 2018).                                                                                                                       |
| C <sub>6,2</sub> Bidirectional                  | The chatbot has the capacity to receive input through different communication channels and it is able to respond through a combination of multiple communication channels (Knote et al. 2018).                                                                                                                                                           |
| <b>D<sub>7</sub> Interaction classification</b> |                                                                                                                                                                                                                                                                                                                                                          |
| C <sub>7,1</sub> Graphical                      | A chatbot interacting with the user only through graphical elements (e.g. predefined buttons for selection). As soon as the chatbot offers a free input text alternative, the interface is no longer considered as graphical (den Boer 2017).                                                                                                            |
| C <sub>7,2</sub> Interactive                    | A chatbot interacting with the user both through graphical elements (e.g. predefined buttons for selection) and plain text input (den Boer 2017).                                                                                                                                                                                                        |
| <b>D<sub>8</sub> Interface personification</b>  |                                                                                                                                                                                                                                                                                                                                                          |
| C <sub>8,1</sub> Disembodied                    | The chatbot does not incorporate visual or physical anthropomorphic or personification features in the form of static, animated or reactive avatars (Bittner et al. 2019).                                                                                                                                                                               |
| C <sub>8,2</sub> Embodied                       | The chatbot incorporates visual or physical anthropomorphic or personification features in the form of static, animated or reactive avatars (Bittner et al. 2019).                                                                                                                                                                                       |
| <b>D<sub>9</sub> User assistance design</b>     |                                                                                                                                                                                                                                                                                                                                                          |
| C <sub>9,1</sub> Reactive assistance            | The chatbot does not have the capability to anticipate or actively ask context-relevant questions to the user by “[...] mak[ing] use of inference, user modeling, and ranking to power experiences” (Sarıkaya 2017 p. 70).                                                                                                                               |
| C <sub>9,2</sub> Proactive assistance           | Proactive assistance implicates the capability of the chatbot to anticipate or actively ask context-relevant questions to the user by “[...] mak[ing] use of                                                                                                                                                                                             |

| <i>Dimension D<sub>i</sub> /Characteristics</i>         | <i>Definition</i>                                                                                                                                                                                                                                                             |
|---------------------------------------------------------|-------------------------------------------------------------------------------------------------------------------------------------------------------------------------------------------------------------------------------------------------------------------------------|
| <i>C<sub>i,j</sub></i>                                  | inference, user modeling, and ranking to power experiences” (Sarikaya 2017 p. 70).                                                                                                                                                                                            |
| <b>D<sub>10</sub> Number of participants</b>            |                                                                                                                                                                                                                                                                               |
| C <sub>10,1</sub> Individual human participant          | The chatbot engages with only one individual human participant per interaction, as it does not have the capacity to simultaneously collaborate with two or more human participants (Bittner et al. 2019).                                                                     |
| C <sub>10,2</sub> Two or more human participants        | The chatbot has the capacity to simultaneously collaborate with two or more human participants in a team-focused environment (Bittner et al. 2019).                                                                                                                           |
| <b>D<sub>11</sub> Additional human support</b>          |                                                                                                                                                                                                                                                                               |
| C <sub>11,1</sub> No                                    | The chatbot does not provide the user with the possibility to contact a human agent in case of open questions.                                                                                                                                                                |
| C <sub>11,2</sub> Yes                                   | The chatbot offers the possibility to contact a human agent in case of open questions (Zumstein and Hundertmark 2017).                                                                                                                                                        |
| <b>D<sub>12</sub> Front-end user interface channel</b>  |                                                                                                                                                                                                                                                                               |
| C <sub>12,1</sub> App                                   | The chatbot is integrated into mobile applications.                                                                                                                                                                                                                           |
| C <sub>12,2</sub> Collaboration and communication tools | The chatbot is integrated into a communication platform such as Microsoft Teams.                                                                                                                                                                                              |
| C <sub>12,3</sub> Social media                          | The chatbot is integrated into social media platforms such as Facebook, Instagram, etc.                                                                                                                                                                                       |
| C <sub>12,4</sub> Website                               | The chatbot is integrated into a Website.                                                                                                                                                                                                                                     |
| C <sub>12,5</sub> Multiple                              | The chatbot is integrated into a combination of multiple platforms.                                                                                                                                                                                                           |
| <b>D<sub>13</sub> Chatbot role</b>                      |                                                                                                                                                                                                                                                                               |
| C <sub>13,1</sub> Facilitator                           | The chatbot “[...] guide[s] users to reach a certain goal or execute a task.” (Bittner et al. 2019 p. 287)                                                                                                                                                                    |
| C <sub>13,2</sub> Peer                                  | The chatbot “[...] aim to merge into a human group or become a sparring partner for an individual” (Bittner et al. 2019 p. 287).                                                                                                                                              |
| C <sub>13,3</sub> Expert                                | The chatbot “[...] ha[s] certain skills or fields of expertise that differ from those of their human teammates [...] Expert CA react to, e.g., user’s query, specific key words or a defined action with a single query like in a FAQ database.” (Bittner et al. 2019 p. 287) |
| <b>D<sub>14</sub> Relation duration</b>                 |                                                                                                                                                                                                                                                                               |
| C <sub>14,1</sub> Short-term relation                   | The chatbot does not have the capability to remember information from previous conversations to influence future interactions (Wei et al. 2018).                                                                                                                              |
| C <sub>14,2</sub> Long-term relation                    | The chatbot has the capability to remember information from previous conversations with the intention of influencing future interactions (Wei et al. 2018).                                                                                                                   |
| <b>D<sub>15</sub> Application domain</b>                |                                                                                                                                                                                                                                                                               |
| C <sub>15,1</sub> E-customer service                    | The chatbot has been designed for supporting the online customer experience.                                                                                                                                                                                                  |
| C <sub>15,2</sub> Daily life                            | The chatbot has been designed for supporting day-to-day activities.                                                                                                                                                                                                           |
| C <sub>15,3</sub> E-commerce                            | The chatbot has been designed for supporting the online commercialization of products and/or services.                                                                                                                                                                        |
| C <sub>15,4</sub> E-learning                            | The chatbot has been designed for supporting online learning processes.                                                                                                                                                                                                       |

| <i>Dimension D<sub>i</sub> /Characteristics</i>  | <i>Definition</i>                                                                                                                                                                                  |
|--------------------------------------------------|----------------------------------------------------------------------------------------------------------------------------------------------------------------------------------------------------|
| <i>C<sub>i,j</sub></i>                           |                                                                                                                                                                                                    |
| C <sub>15,5</sub> Finance                        | The chatbot has been designed for supporting financial transactions.                                                                                                                               |
| C <sub>15,6</sub> Work and career                | The chatbot has been designed for supporting professional life activities.                                                                                                                         |
| <b>D<sub>16</sub> Collaboration goal</b>         |                                                                                                                                                                                                    |
| C <sub>16,1</sub> Non goal-oriented              | The aim of the chatbot is not to support the user to accomplish a common goal or task but to enable the interaction with the user through question-answer dialogues (Bittner et al. 2019).         |
| C <sub>16,2</sub> Goal-oriented                  | The chatbot helps and collaborates with the user to accomplish a common goal or task (Bittner et al. 2019).                                                                                        |
| <b>D<sub>17</sub> Motivation for chatbot use</b> |                                                                                                                                                                                                    |
| C <sub>17,1</sub> Productivity                   | The primary extrinsic motivation for chatbot use is embodied in the potential to improve the efficiency in the use of personal resources (e.g. time, money, etc.)                                  |
| C <sub>17,2</sub> Entertainment                  | The primary extrinsic motivation for chatbot use is embodied in the potential to enhance the leisure time or to obtain, e.g., a distraction or relaxation.                                         |
| C <sub>17,3</sub> Social/relational              | The primary extrinsic motivation for chatbot use is embodied in the expectation to achieve social or interpersonal relationship gains such as peer recognition, etc.                               |
| C <sub>17,4</sub> Utility                        | The primary extrinsic motivation for chatbot use is linked to a practical use that presents the possibility to attain, e.g., quick or detailed knowledge or a direct or indirect financial reward. |



**Table A.3** Company sample with name of the chatbot, website, and source

| <i>Chatbot</i>                          | <i>Website</i>                                                                                                                                                                                                                                                  | <i>Source</i>        |
|-----------------------------------------|-----------------------------------------------------------------------------------------------------------------------------------------------------------------------------------------------------------------------------------------------------------------|----------------------|
| AiRelo                                  | <a href="https://www.facebook.com/messages/t/AiReloMe">https://www.facebook.com/messages/t/AiReloMe</a>                                                                                                                                                         | chatbots.org         |
| Alizia Deixis                           | <a href="http://www.dexilabs.com/alizia.html">http://www.dexilabs.com/alizia.html</a>                                                                                                                                                                           | chatbots.org         |
| Allerhande Chatbot                      | <a href="https://www.messenger.com/t/205510929509436">https://www.messenger.com/t/205510929509436</a>                                                                                                                                                           | chatbots.org         |
| Altai                                   | <a href="http://www.dulynx.fr/emergence/">http://www.dulynx.fr/emergence/</a>                                                                                                                                                                                   | chatbots.org         |
| Amanda                                  | <a href="https://www.anglianwater.co.uk/">https://www.anglianwater.co.uk/</a>                                                                                                                                                                                   | chatbots.org         |
| Ana Copa Airlines                       | <a href="http://copaair.intelliresponse.com/index.jsp">http://copaair.intelliresponse.com/index.jsp</a>                                                                                                                                                         | chatbots.org         |
| Andrew HSBC                             | <a href="https://www.business.hsbc.uk/en-gb">https://www.business.hsbc.uk/en-gb</a>                                                                                                                                                                             | chatbots.org         |
| Annemiek                                | <a href="http://www.spoorwegpensioenfonds.nl/">http://www.spoorwegpensioenfonds.nl/</a>                                                                                                                                                                         | chatbots.org         |
| Ariane                                  | <a href="https://www.cdc.retraites.fr/portail/spip.php?page=rubrique&amp;id_rubrique=121">https://www.cdc.retraites.fr/portail/spip.php?page=rubrique&amp;id_rubrique=121</a>                                                                                   | chatbots.org         |
| Asistente Virtual Fast Food Burger King | <a href="http://www.burgerking.com.ar/atencion-al-cliente">http://www.burgerking.com.ar/atencion-al-cliente</a>                                                                                                                                                 | chatbots.org         |
| Ask Me                                  | <a href="https://www.online.citibank.co.in/customerservice/home.htm">https://www.online.citibank.co.in/customerservice/home.htm</a>                                                                                                                             | chatbots.org         |
| AufsperrBot Wien                        | <a href="https://www.facebook.com/AufsperrBot/">https://www.facebook.com/AufsperrBot/</a>                                                                                                                                                                       | chatbots.org         |
| AVI                                     | <a href="http://marketplace.smart-home.com.co/avi.aspx?projectId=sJ3h--6x1cbgNtNB4t43cKgGXaxM5UOcYsaLx-xTYfItqr7uIQcAOpD0Ut09E2GT">http://marketplace.smart-home.com.co/avi.aspx?projectId=sJ3h--6x1cbgNtNB4t43cKgGXaxM5UOcYsaLx-xTYfItqr7uIQcAOpD0Ut09E2GT</a> | chatbots.org         |
| AXA Chatbot                             | <a href="https://de-de.facebook.com/AXA.de/">https://de-de.facebook.com/AXA.de/</a>                                                                                                                                                                             | chatbots.org         |
| Bahai_QnA                               | <a href="http://peninsulabahai.us/chatbot/">http://peninsulabahai.us/chatbot/</a>                                                                                                                                                                               | chatbots.org         |
| B-bot TV                                | <a href="https://www.messenger.com/t/bbottv">https://www.messenger.com/t/bbottv</a>                                                                                                                                                                             | chatbots.org         |
| Betty                                   | <a href="http://www.myfemcare.com.sg">http://www.myfemcare.com.sg</a>                                                                                                                                                                                           | chatbots.org         |
| Bitcoin Buddy                           | <a href="https://www.facebook.com/messages/t/btcadviser">https://www.facebook.com/messages/t/btcadviser</a>                                                                                                                                                     | chatbots.org         |
| Bitcoin Price Analytics Bot             | <a href="https://t.me/BitcoinPriceAnalyticsBot">https://t.me/BitcoinPriceAnalyticsBot</a>                                                                                                                                                                       | chatbots.org         |
| BO.T                                    | <a href="https://m.me/medicenBOT">https://m.me/medicenBOT</a>                                                                                                                                                                                                   | chatbots.org         |
| Brain Bot                               | <a href="http://www.botlibre.com/BrowseServlet?browse=Brain+Bot">http://www.botlibre.com/BrowseServlet?browse=Brain+Bot</a>                                                                                                                                     | chatbots.org         |
| BRiN                                    | <a href="https://brin.ai/">https://brin.ai/</a>                                                                                                                                                                                                                 | chatbots.org         |
| Bussense                                | <a href="http://m.me/bussense.org">http://m.me/bussense.org</a>                                                                                                                                                                                                 | chatbots.org         |
| Car Dealer Chatbot                      | <a href="https://www.chatbots.systems/?utm_source=botlist">https://www.chatbots.systems/?utm_source=botlist</a>                                                                                                                                                 | botlist most-popular |
| Cécile                                  | <a href="https://www.pole-emploi.fr/employeur/assistance-technique-@/article.jspz?id=68914">https://www.pole-emploi.fr/employeur/assistance-technique-@/article.jspz?id=68914</a>                                                                               | chatbots.org         |
| ChatBot.RO                              | <a href="https://www.messenger.com/t/chatbot.ROU">https://www.messenger.com/t/chatbot.ROU</a>                                                                                                                                                                   | chatbots.org         |
| Clara                                   | <a href="https://www.otto.de/shoppages/service/faq">https://www.otto.de/shoppages/service/faq</a>                                                                                                                                                               | chatbots.org         |
| Clarizen Bot                            | <a href="https://www.clarizen.com/bot-slack/">https://www.clarizen.com/bot-slack/</a>                                                                                                                                                                           | chatbots.org         |
| CNN                                     | <a href="https://www.messenger.com/t/cnn">https://www.messenger.com/t/cnn</a>                                                                                                                                                                                   | chatbots.org         |
| Coin Kolumbus                           | <a href="https://telegram.me/CoinKolumbusBot">https://telegram.me/CoinKolumbusBot</a>                                                                                                                                                                           | chatbots.org         |
| Combot                                  | <a href="https://combot.org/">https://combot.org/</a>                                                                                                                                                                                                           | botlist most-popular |
| CruiseBe                                | <a href="https://www.messenger.com/t/cruisebecom">https://www.messenger.com/t/cruisebecom</a>                                                                                                                                                                   | chatbots.org         |
| Dinner Ideas                            | <a href="https://www.facebook.com/DinnerIdeasBot/">https://www.facebook.com/DinnerIdeasBot/</a>                                                                                                                                                                 | chatbots.org         |
| Drop Shipping                           | <a href="http://m.me/b2b.spycob">http://m.me/b2b.spycob</a>                                                                                                                                                                                                     | chatbots.org         |
| Dropshipping Assistant                  | <a href="https://www.facebook.com/DropshippingAssistant/?utm_source=botlist">https://www.facebook.com/DropshippingAssistant/?utm_source=botlist</a>                                                                                                             | botlist most-popular |
| Else                                    | <a href="http://www.cjgkampen.nl/else">http://www.cjgkampen.nl/else</a>                                                                                                                                                                                         | chatbots.org         |
| Erwin                                   | <a href="http://m.me/erwin.chat">http://m.me/erwin.chat</a>                                                                                                                                                                                                     | chatbots.org         |
| eShangazi                               | <a href="https://m.me/eshangazibot">https://m.me/eshangazibot</a>                                                                                                                                                                                               | chatbots.org         |
| Flower Checker                          | <a href="https://www.flowerchecker.com/">https://www.flowerchecker.com/</a>                                                                                                                                                                                     | chatbots.org         |
| freshr                                  | <a href="https://m.me/hellofreshr?ref=listing_bot">https://m.me/hellofreshr?ref=listing_bot</a>                                                                                                                                                                 | chatbots.org         |
| Gardy                                   | <a href="https://www.messenger.com/t/insightbot">https://www.messenger.com/t/insightbot</a>                                                                                                                                                                     | chatbots.org         |
| Gero                                    | <a href="https://www.messenger.com/t/hellogero">https://www.messenger.com/t/hellogero</a>                                                                                                                                                                       | chatbots.org         |

| <i>Chatbot</i>                      | <i>Website</i>                                                                                                                                                                                                                                                                                                | <i>Source</i>        |
|-------------------------------------|---------------------------------------------------------------------------------------------------------------------------------------------------------------------------------------------------------------------------------------------------------------------------------------------------------------|----------------------|
| Haptik Assistant (Finance)          | <a href="https://play.google.com/store/apps/details?id=co.haptik">https://play.google.com/store/apps/details?id=co.haptik</a>                                                                                                                                                                                 | chatbots.org         |
| Hazie                               | <a href="https://www.facebook.com/HazieBot/">https://www.facebook.com/HazieBot/</a>                                                                                                                                                                                                                           | chatbots.org         |
| Helios                              | <a href="https://www.helioslife.enterprises/">https://www.helioslife.enterprises/</a>                                                                                                                                                                                                                         | botlist most-popular |
| HillyYEAH! Bot                      | <a href="http://www.facebook.com/hillyyeah2016">http://www.facebook.com/hillyyeah2016</a>                                                                                                                                                                                                                     | chatbots.org         |
| Horoscoop                           | <a href="https://www.messenger.com/t/metrohoroscoop">https://www.messenger.com/t/metrohoroscoop</a>                                                                                                                                                                                                           | chatbots.org         |
| IFRS Rookies                        | <a href="https://www.facebook.com/ifrsrookies/">https://www.facebook.com/ifrsrookies/</a>                                                                                                                                                                                                                     | chatbots.org         |
| InviteMember                        | <a href="https://invitemember.com/">https://invitemember.com/</a>                                                                                                                                                                                                                                             | botlist most-popular |
| James                               | <a href="http://playground.pandorabots.com">http://playground.pandorabots.com</a>                                                                                                                                                                                                                             | chatbots.org         |
| Jaquelina                           | <a href="http://www.spov.nl/">http://www.spov.nl/</a>                                                                                                                                                                                                                                                         | chatbots.org         |
| Jim                                 | <a href="http://www.saferwholesale.com/Default.asp">http://www.saferwholesale.com/Default.asp</a>                                                                                                                                                                                                             | chatbots.org         |
| Joe                                 | <a href="http://www.plus.net/help/">http://www.plus.net/help/</a>                                                                                                                                                                                                                                             | chatbots.org         |
| Julia                               | <a href="https://www.kabeldeutschland.de/csc">https://www.kabeldeutschland.de/csc</a>                                                                                                                                                                                                                         | chatbots.org         |
| Julie (Social)                      | <a href="http://www.botlibre.com/browse?id=667676">http://www.botlibre.com/browse?id=667676</a>                                                                                                                                                                                                               | chatbots.org         |
| Julie (Travel)                      | <a href="https://www.amtrak.com/about-julie-amtrak-virtual-travel-assistant">https://www.amtrak.com/about-julie-amtrak-virtual-travel-assistant</a>                                                                                                                                                           | chatbots.org         |
| Kim                                 | <a href="https://www.nspower.ca/en/home/default.aspx">https://www.nspower.ca/en/home/default.aspx</a>                                                                                                                                                                                                         | chatbots.org         |
| Komms.io                            | <a href="http://www.komms.io/index.html">http://www.komms.io/index.html</a>                                                                                                                                                                                                                                   | botlist most-popular |
| Kurna the Klingon                   | <a href="https://mybot.be/chat/-KcnG99buxsyZVPg3ZCS">https://mybot.be/chat/-KcnG99buxsyZVPg3ZCS</a>                                                                                                                                                                                                           | chatbots.org         |
| Leadza                              | <a href="https://www.facebook.com/leadza/videos/vb.1406517502944972/1971309479799102/?type=2&amp;theater">https://www.facebook.com/leadza/videos/vb.1406517502944972/1971309479799102/?type=2&amp;theater</a>                                                                                                 | botlist most-popular |
| Marina                              | <a href="https://www.facebook.com/100-Regali-per-Lei-1032628263531363/">https://www.facebook.com/100-Regali-per-Lei-1032628263531363/</a>                                                                                                                                                                     | chatbots.org         |
| Medicare And Social Security Answer | <a href="https://www.retirety.com/">https://www.retirety.com/</a>                                                                                                                                                                                                                                             | chatbots.org         |
| Mega Deals                          | <a href="https://btcdirect.eu/nl-nl">https://btcdirect.eu/nl-nl</a>                                                                                                                                                                                                                                           | botlist most-popular |
| mensabot                            | <a href="https://kikmensabot.herokuapp.com/chat">https://kikmensabot.herokuapp.com/chat</a>                                                                                                                                                                                                                   | chatbots.org         |
| Millie                              | <a href="https://new.myhermes.co.uk/before-you-get-in-touch.html">https://new.myhermes.co.uk/before-you-get-in-touch.html</a>                                                                                                                                                                                 | chatbots.org         |
| Minty Talk                          | <a href="https://www.facebook.com/mintytoons">https://www.facebook.com/mintytoons</a>                                                                                                                                                                                                                         | chatbots.org         |
| MonCompteFormation                  | <a href="http://www.moncompteformation.gouv.fr">http://www.moncompteformation.gouv.fr</a>                                                                                                                                                                                                                     | chatbots.org         |
| Name Guru                           | <a href="http://www.babynames.ch/Guru">http://www.babynames.ch/Guru</a>                                                                                                                                                                                                                                       | chatbots.org         |
| National Geographic Trivia Bot      | <a href="https://chatbotslife.com/how-national-geographic-engaged-its-facebook-audience-with-a-trivia-chatbot-bot-marketing-189507d6c380?gi=ac2df2bf9b71">https://chatbotslife.com/how-national-geographic-engaged-its-facebook-audience-with-a-trivia-chatbot-bot-marketing-189507d6c380?gi=ac2df2bf9b71</a> | botlist most-popular |
| Neomy                               | <a href="http://m.me/yourneomy">http://m.me/yourneomy</a>                                                                                                                                                                                                                                                     | chatbots.org         |
| Pathology Lab Chatbot               | <a href="https://www.lalpathlabs.com/">https://www.lalpathlabs.com/</a>                                                                                                                                                                                                                                       | chatbots.org         |
| Poncho                              | <a href="https://www.chatbots.org/chatbot/poncho/">https://www.chatbots.org/chatbot/poncho/</a>                                                                                                                                                                                                               | chatbots.org         |
| Rammas Virtual Agent                | <a href="https://www.dewa.gov.ae/en/rammas?utm_source=botlist">https://www.dewa.gov.ae/en/rammas?utm_source=botlist</a>                                                                                                                                                                                       | botlist most-popular |
| Rembo                               | <a href="https://haptik.ai/rembo?ref=direct&amp;_branch_match_id=673898596276084244">https://haptik.ai/rembo?ref=direct&amp;_branch_match_id=673898596276084244</a>                                                                                                                                           | chatbots.org         |
| Rewardy                             | <a href="https://m.me/rewardy.co?ref=landing">https://m.me/rewardy.co?ref=landing</a>                                                                                                                                                                                                                         | chatbots.org         |
| Simbibot                            | <a href="https://simbibot.com/">https://simbibot.com/</a>                                                                                                                                                                                                                                                     | chatbots.org         |
| Singapore Weather Bot               | <a href="https://www.facebook.com/messages/t/wbotbyrth">https://www.facebook.com/messages/t/wbotbyrth</a>                                                                                                                                                                                                     | chatbots.org         |
| SkinvisionBot                       | <a href="https://www.facebook.com/skinabot/">https://www.facebook.com/skinabot/</a>                                                                                                                                                                                                                           | chatbots.org         |
| Smarty                              | <a href="https://apps.apple.com/us/app/smarty-answers-to-all-questions/id1211970601">https://apps.apple.com/us/app/smarty-answers-to-all-questions/id1211970601</a>                                                                                                                                           | chatbots.org         |
| Soa Seks Check                      | <a href="https://soasekscheck.nl">https://soasekscheck.nl</a>                                                                                                                                                                                                                                                 | chatbots.org         |
| Soccer.bot                          | <a href="https://bots.kik.com/#/soccer.bot">https://bots.kik.com/#/soccer.bot</a>                                                                                                                                                                                                                             | chatbots.org         |
| Sofia (Finance)                     | <a href="http://microlending.com.ar/contacto">http://microlending.com.ar/contacto</a>                                                                                                                                                                                                                         | chatbots.org         |
| Sofia (Travel)                      | <a href="http://www.flytap.com/Portugal/en/Homepage">http://www.flytap.com/Portugal/en/Homepage</a>                                                                                                                                                                                                           | chatbots.org         |
| Sophie                              | <a href="http://www.congstar.de/hilfe-service/?zxid=1579825254208189440&amp;zuserid=134386">http://www.congstar.de/hilfe-service/?zxid=1579825254208189440&amp;zuserid=134386</a>                                                                                                                             | chatbots.org         |

| <i>Chatbot</i>                      | <i>Website</i>                                                                                                                                                              | <i>Source</i>        |
|-------------------------------------|-----------------------------------------------------------------------------------------------------------------------------------------------------------------------------|----------------------|
| Stina (stena Line)                  | <a href="https://itunes.apple.com/gb/app/travelmate-stena-line/id503869301?mt=8">https://itunes.apple.com/gb/app/travelmate-stena-line/id503869301?mt=8</a>                 | chatbots.org         |
| TalkToTheWord                       | <a href="https://www.talktotheword.com/?utm_source=botlist">https://www.talktotheword.com/?utm_source=botlist</a>                                                           | botlist most-popular |
| T-Bot                               | <a href="http://www.infotbc.com/">http://www.infotbc.com/</a>                                                                                                               | chatbots.org         |
| Terry Tablet                        | <a href="https://help89.creativevirtual.com/gsol/bot.htm?isJSEnabled=1">https://help89.creativevirtual.com/gsol/bot.htm?isJSEnabled=1</a>                                   | chatbots.org         |
| The Best Constructor                | <a href="https://www.facebook.com/chatfuel/?fref=ts">https://www.facebook.com/chatfuel/?fref=ts</a>                                                                         | chatbots.org         |
| The Durian Chatbot                  | <a href="http://thedurianchatbot.strikingly.com/">http://thedurianchatbot.strikingly.com/</a>                                                                               | chatbots.org         |
| Toni, the Football Chatbot          | <a href="https://toni.football/">https://toni.football/</a>                                                                                                                 | chatbots.org         |
| uInterview                          | <a href="https://m.me/Uinterview">https://m.me/Uinterview</a>                                                                                                               | chatbots.org         |
| Vet Fit Health Coach                | <a href="https://www.facebook.com/vetfitnl/">https://www.facebook.com/vetfitnl/</a>                                                                                         | chatbots.org         |
| Virtuele Assistent                  | <a href="https://www.centraalbeheer.nl/contact/paginas/contactpagina.aspx">https://www.centraalbeheer.nl/contact/paginas/contactpagina.aspx</a>                             | chatbots.org         |
| Virtuele medewerker                 | <a href="https://www.ditzo.nl/service">https://www.ditzo.nl/service</a>                                                                                                     | chatbots.org         |
| Virtueller Bürger-Service-Assistent | <a href="https://service.berlin.de/virtueller-assistent/virtueller-assistent-606279.php">https://service.berlin.de/virtueller-assistent/virtueller-assistent-606279.php</a> | chatbots.org         |
| Vouchee                             | <a href="https://www.messenger.com/t/1494754200567989">https://www.messenger.com/t/1494754200567989</a>                                                                     | chatbots.org         |
| Weps                                | <a href="http://www.getweps.com/chatbot">http://www.getweps.com/chatbot</a>                                                                                                 | chatbots.org         |
| Widdy                               | <a href="https://www.widiba.it/banca/online/it/home">https://www.widiba.it/banca/online/it/home</a>                                                                         | chatbots.org         |
| Woobot.io                           | <a href="https://woobot.io/">https://woobot.io/</a>                                                                                                                         | botlist most-popular |
| Yar                                 | <a href="https://www.yourhosting.nl/support/contact/">https://www.yourhosting.nl/support/contact/</a>                                                                       | chatbots.org         |
| Yoko                                | <a href="http://www.toshiba.fr/innovation/generic/SUPPORT_PORTAL/">http://www.toshiba.fr/innovation/generic/SUPPORT_PORTAL/</a>                                             | chatbots.org         |
| Ziman                               | <a href="https://play.google.com/store/apps/details?id=com.mociz.zimanpro&amp;hl=en">https://play.google.com/store/apps/details?id=com.mociz.zimanpro&amp;hl=en</a>         | chatbots.org         |

**Table A.4** Recommended number of clusters of 103 domain-specific chatbots surveyed

| <i>Measure by</i>              | <i>Recommended amount of clusters (kMeans)</i> |
|--------------------------------|------------------------------------------------|
| Ball and Hall (1965)           | 3                                              |
| Caliński and Harabasz (1974)   | 2                                              |
| Davies and Bouldin (1979)      | 7                                              |
| Dunn (1974)                    | 7                                              |
| Frey and Van Groenewoud (1972) | NA                                             |
| Halkidi et al. (2000)          | 6                                              |
| Hartigan (1975)                | 4                                              |
| Hubert and Levin (1976)        | 6                                              |
| Krzanowski and Lai (1988)      | 4                                              |
| McClain and Rao (1975)         | 2                                              |
| Milligan (1980, 1981)          | 8                                              |
| Rousseeuw (1987)               | 2                                              |
| Tibshirani et al. (2001)       | 2                                              |

**Table A.5** Compliance with the adopted ending conditions

| <i>Iteration 1</i> | <i>Iteration 2</i> | <i>Iteration 3</i> | <i>Iteration 4</i> | <i>Iteration 5</i> | <i>Evaluation phase</i>                                                                   |
|--------------------|--------------------|--------------------|--------------------|--------------------|-------------------------------------------------------------------------------------------|
| Conceptual         | Empirical          | Empirical          | Empirical          | Empirical          | <b>Focus groups</b>                                                                       |
|                    | •                  | •                  | •                  | •                  | • <b>Subjective ending conditions (Nickerson et al. 2013)</b>                             |
|                    | •                  | •                  | •                  | •                  | • Mutually exclusive: no object has two different characteristics in a dimension          |
|                    |                    |                    |                    |                    | • Collectively exhaustive: each chatbot has at least one characteristic in each dimension |
|                    |                    |                    |                    |                    | • Concise: dimensions and characteristics are limited                                     |
| •                  | •                  | •                  | •                  | •                  | • Robust: sufficient number of dimensions and characteristics                             |
|                    |                    |                    |                    | •                  | • Comprehensive: identification of all (relevant) dimensions of an object                 |
| •                  | •                  | •                  | •                  | •                  | • Extendable: possibility to easily add dimensions and characteristics in the future      |
|                    |                    |                    |                    |                    | • Explanatory: dimensions and characteristics sufficiently explain the object             |
|                    |                    |                    |                    |                    | <b>Objective ending conditions (Nickerson et al. 2013)</b>                                |
|                    | • (12)             | • (78)             | • (91)             | • (all)            | • All chatbots (or a representative sample) were analyzed                                 |
|                    |                    |                    |                    | •                  | • No object was merged or split                                                           |
|                    |                    | •                  | •                  | •                  | • At least one object assigned to each characteristic                                     |
|                    |                    |                    |                    | •                  | • No new dimensions or characteristics were added                                         |
|                    |                    |                    |                    | •                  | • No dimensions or characteristics were merged or split                                   |
|                    |                    | •                  | •                  | •                  | • Every dimension is unique                                                               |
|                    |                    |                    | •                  | •                  | • Every characteristic within the dimension is unique                                     |
|                    |                    |                    | •                  | •                  | • Every combination of characteristics is unique                                          |

## References

- Ball, GH, Hall DJ (1965) Isodata: a novel method of data analysis and pattern classification. Menlo Park: Stanford Research Institute
- Caliński T, Harabasz J (1974) A dendrite method for cluster analysis. *Commun Stat* 3(1):1–27
- Chen H, Liu X, Yin D, Tang J (2017) A survey on dialogue systems: advances and new frontiers. *ACM SIGKDD Explor Newsl* 19(2):25–35
- Davies DL, Bouldin DW (1979) A cluster separation measure. *IEEE Transact Pattern Anal Mach Intell* 1(2):224–227
- Dunn J (1974) Well separated clusters and optimal fuzzy partitions. *J Cybern* 4(1):95–104
- Edwards JL, Mason JA (1988) Evaluating the intelligence in dialogue systems. *Int J Man-Mach Stud* 28(2-3):139–173
- Ehrenbrink P, Hillmann S, Weiss B, Möller S (2016) Psychological reactance in HCI: a method towards improving acceptance of devices and services. *ACM Press*, pp 478–482

- Frey T, Van Groenewoud H (1972) A cluster analysis of the D-squared matrix of white spruce stands in Saskatchewan based on the maximum-minimum principle. *J Ecol* 60(3):873–886
- Halkidi M, Vazirgiannis M, Batistakis I (2000) Quality scheme assessment in the clustering process. In: *Proceedings of the 4th PKDD Conference, Lyon*, pp 265–276
- Hartigan JA (1975) *Clustering algorithms*. Wiley, New York
- Hubert LJ, Levin JR (1976) A general statistical framework for assessing categorical clustering in free recall. *Psychol Bull* 83(6):1072–1080
- Knote R, Janson A, Söllner M, Leimeister JM (2019) Classifying smart personal assistants: An empirical cluster analysis. In: *52nd HICSS proceedings, Maui*, pp 2024–2033
- Krzanowski WJ, Lai YT (1988) A criterion for determining the number of groups in a data set using sum-of-squares clustering. *Biom* 44(1):23–34
- Lee KH, Choi Y, Stonier DJ (2012) Evolutionary algorithm for a genetic robot's personality based on the Myers\_Briggs Type Indicator. *Robot Auton Syst* 60(7):941–961
- Li X, Lipton ZC, Dhingra B, Li L, Gao J, Chen YN (2016) A user simulator for task-completion dialogues. *arXiv preprint arXiv:1612.05688*, pp 1–14
- McClain JO, Rao VR (1975) Clustisz: a program to test for the quality of clustering of a set of objects. *J Market Res* 12(4):456–460
- Milligan GW (1980) An examination of the effect of six types of error perturbation on fifteen clustering algorithms. *Psychometrika* 45(3):325–342
- Milligan GW (1981) A Monte Carlo study of thirty internal criterion measures for cluster analysis. *Psychometrika* 46(2):187–199
- Montenegro JLZ, da Costa CA, da Rosa Righi R (2019) Survey of conversational agents in health. *Exp Syst Appl* 129:56–67
- Ochs M, Pelachaud C, Mckeown G (2017) A user perception-based approach to create smiling embodied conversational agents. *ACM Transact Interact Intell Syst* 7(1):A1–A33
- Pfeuffer N, Benlian A, Gimpel H, Hinz O (2019) Anthropomorphic information systems. *Bus Inf Syst Eng* 61(4):1–11
- Piccolo LS, Mensio M, Alani H (2018) Chasing the chatbots. In: *Int Conference on Internet Science proceedings*, pp 157–169
- Rousseeuw P (1987) Silhouettes: A graphical aid to the interpretation and validation of cluster analysis. *J Comput Appl Math* 20:53–65

- Schuetzler RM, Grimes GM, Giboney JS (2019) The effect of conversational agent skill on user behavior during deception. *Comput Hum Behav* 97:250–259
- Shum HY, He XD, Li D (2018) From Eliza to XiaoIce: challenges and opportunities with social chatbots. *Front Inf Technol Electron Eng* 19(1):10–26
- Strohmann T, Siemon D, Robra-Bissantz S (2019) Designing virtual in-vehicle assistants: design guidelines for creating a convincing user experience. *AIS Transact Hum-Comput Interact* 11(2):54–78
- Sukhbaatar S, Weston, J, Fergus R (2015) End-to-end memory networks. In: *Advances in Neural Information Processing Systems*, Montreal, pp 2440–2448
- Tibshirani R, Walther G, Hastie T (2001) Estimating the number of clusters in a data set via the gap statistic. *J Royal Stat Soc B* 63(2):411–423
- Thorne C (2017) Chatbots for troubleshooting: a survey. *Lang Linguist Compass* 11(10):1–14
- Yalçın ÖN (2019) Empathy framework for embodied conversational agents. *Cognit Syst Res* 59:123–132
- Zheng Y (2019) Utility-based multi-criteria recommender systems. In: *Proceedings of the 34th ACM/SIGAPP Symposium on Applied Computing*, Limassol, pp 2529–2531
